# Supplementary material
Source: MDPI journal article supplement (https://www.mdpi.com/2304-6740/10/5/59)
Supplement: s1 [file s1]

Supplementary

# Sacrificial Zinc Oxide Strategy-Enhanced Mesoporosity in MIL-53-Derived Iron–Carbon Composite for Methylene Blue Adsorption

Sander Dekyvere <sup>1,2,†</sup>, Mohamed Elhousseini Hilal <sup>1,2,3,†</sup>, Somboon Chaemchuen <sup>1,2</sup>, Serge Zhuiykov <sup>4</sup> and Francis Verpoort <sup>1,2,5,\*</sup>

<sup>1</sup> State Key Laboratory of Advanced Technology for Materials Synthesis and Processing, Wuhan University of Technology, Wuhan 430070, China; sander4a@hotmail.com (S.D.); melhousseinihilal@hkcoche.org (M.E.H.); sama\_che@hotmail.com (S.C.)

<sup>2</sup> School of Materials Science and Engineering, Wuhan University of Technology, Wuhan 430070, China

<sup>3</sup> Hong Kong Centre for Cerebro-Cardiovascular Health Engineering (COCHE), Building 17W, Hong Kong Science Park, Hong Kong 999077, China

<sup>4</sup> Department of Solid State Science, Faculty of Science, Ghent University Global Campus, Songdo, 119 Songdomunhwa-Ro, Yeonsu-Gu, Incheon 404-840, Korea; serge.zhuiykov@ghent.ac.kr

<sup>5</sup> National Research Tomsk Polytechnic University, Lenin Avenue 30, 634034 Tomsk, Russia

\* Correspondence: francis@whut.edu.cn

† These authors contributed equally to this work.

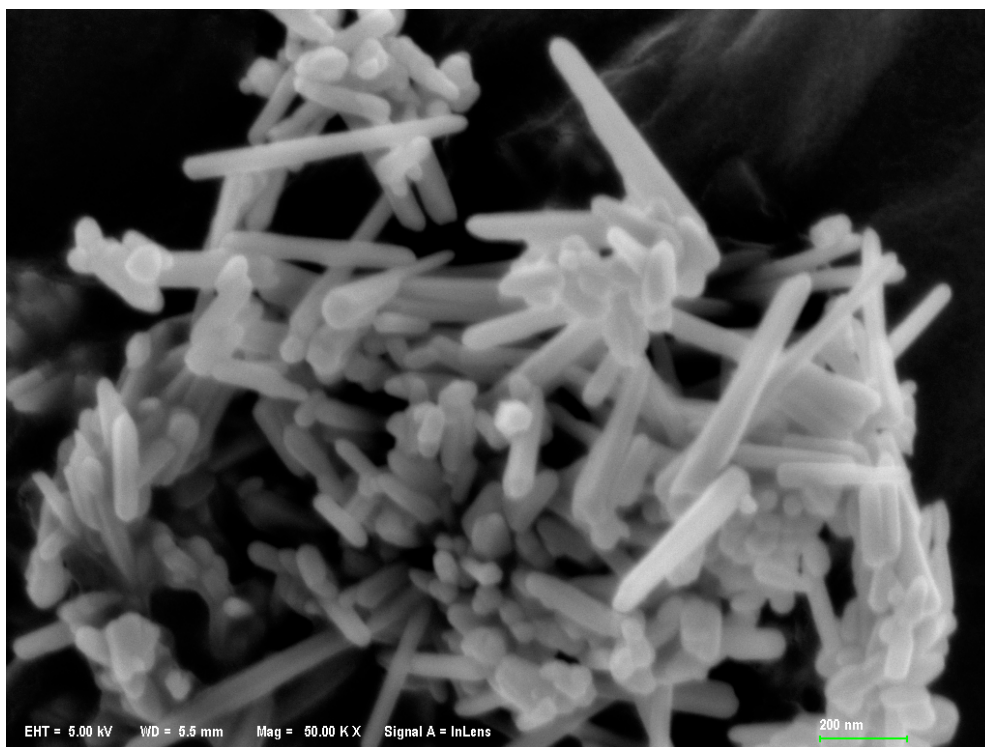

Figure S1. SEM micrograph of zinc oxide nanorods.

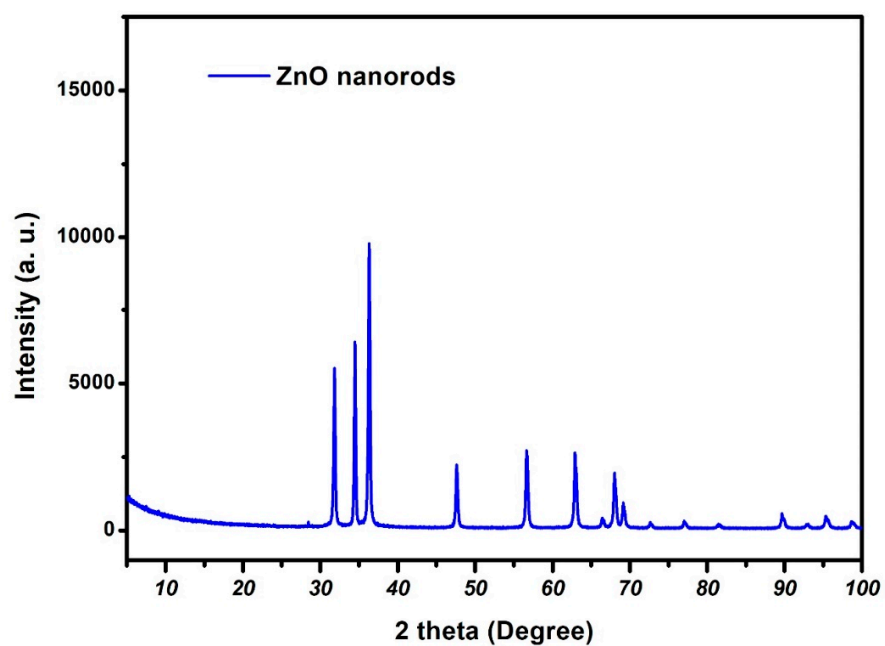

Figure S2. X-Ray diffraction of zinc oxide nanorods.

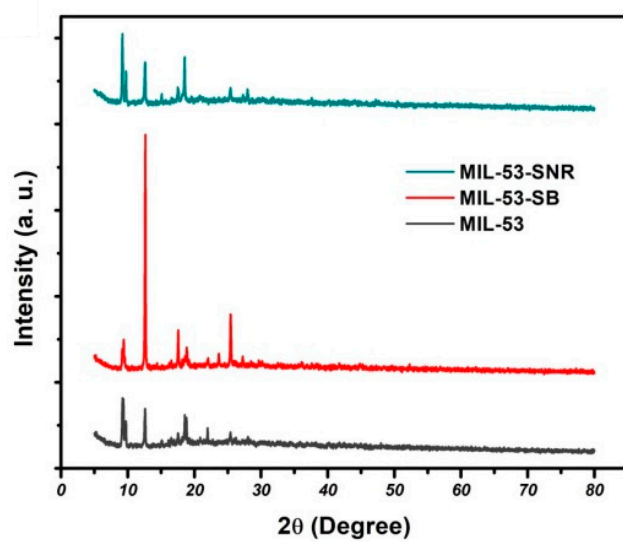

Figure S3. X-Ray diffraction spectra of MIL-53-SNR, MIL-53-SB, MIL-53.

**Table S1.** ICP results of MIL-53-SB and MIL-53-SNR.

| Sample     | Metallic content before pyrolysis |      | Metallic content after pyrolysis |      |
|------------|-----------------------------------|------|----------------------------------|------|
|            | Fe %                              | Zn % | Fe %                             | Zn % |
| MIL-53-SB  | 21.77                             | 0.26 | 65.75                            | 0.01 |
| MIL-53-SNR | 21.19                             | 0.02 | 61.87                            | 0.01 |

**Table S2.** Volume and surface area of micropores and mesopores of pyrolyzed samples.

| Sample   | Volume of micropores (cm <sup>3</sup> g <sup>-1</sup> ) | Surface area of the micropores (m <sup>2</sup> g <sup>-1</sup> ) | Volume of mesopores (width 2 nm – 20 nm) (cm <sup>3</sup> g <sup>-1</sup> ) | Surface area of mesopores (width 2 nm – 20 nm) (m <sup>2</sup> g <sup>-1</sup> ) |
|----------|---------------------------------------------------------|------------------------------------------------------------------|-----------------------------------------------------------------------------|----------------------------------------------------------------------------------|
| Fe-C     | 0.078                                                   | 119                                                              | 0.087                                                                       | 47                                                                               |
| Fe-C-SB  | 0.059                                                   | 179                                                              | 0.055                                                                       | 27                                                                               |
| Fe-C-SNR | 0.028                                                   | 78                                                               | 0.169                                                                       | 92                                                                               |

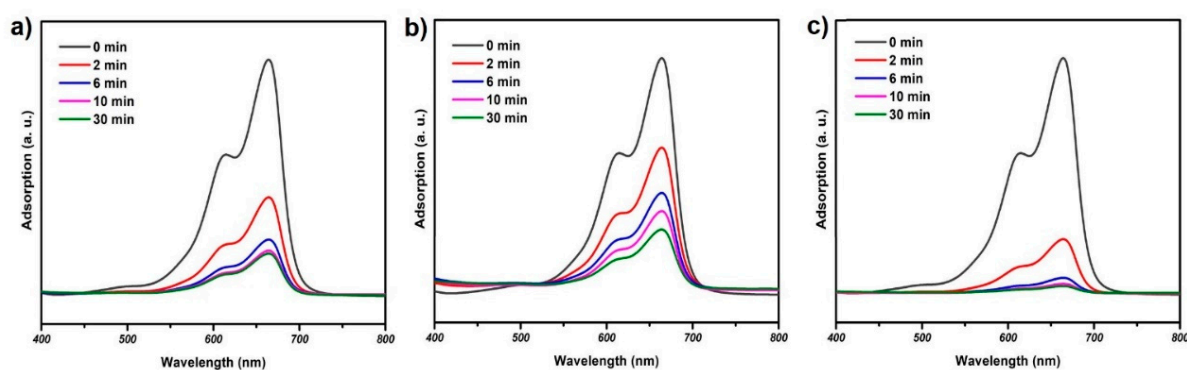

**Figure S4.** Adsorption performance of the three samples: a) Fe-C, b) Fe-C-SB, c) Fe-C-SNR.

**Table S3.** Kinetic parameters of pseudo first order and pseudo second order models for the adsorption of methylene blue onto Fe-C-SNR.

|                    | Pseudo First Order              | Pseudo Second Order                              |
|--------------------|---------------------------------|--------------------------------------------------|
| $q_e$ experimental | 50                              | 50                                               |
| $q_e$ calculated   | 35.5                            | 50.2                                             |
| k                  | $k_1 = 0.5644 \text{ min}^{-1}$ | $k_2 = 10.3322 \text{ g mg}^{-1}\text{min}^{-1}$ |
| $R^2$              | 0.9522                          | 0.9997                                           |

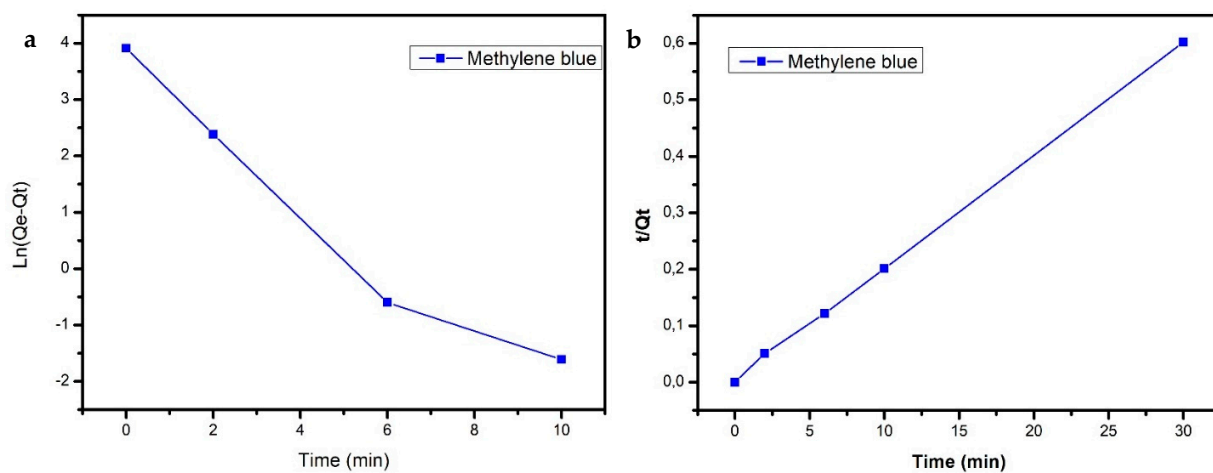

**Figure S5.** Kinetic plots for the adsorption of methylene blue on Fe-C-SNR a) Plot of the pseudo-first-order kinetic model; b) plot of the pseudo-second-order kinetic model.

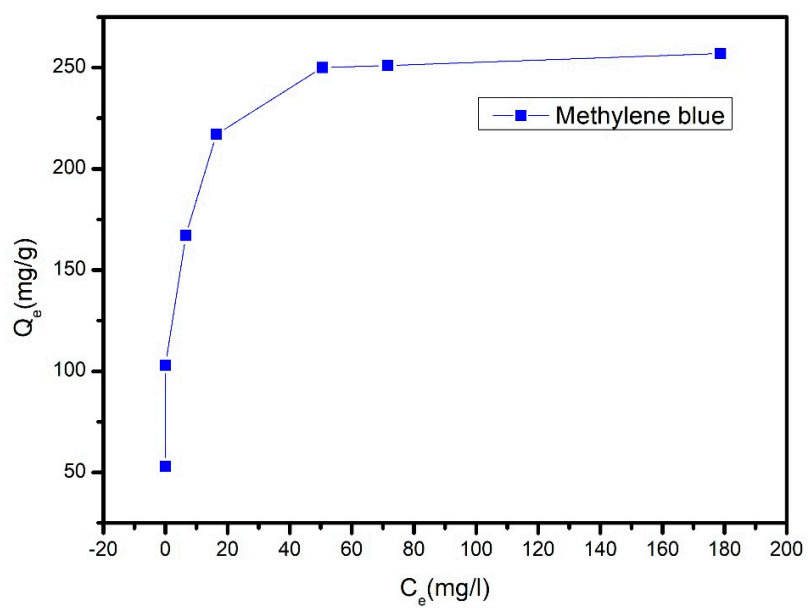

**Figure S6.** Adsorption isotherm of methylene blue on Fe-C-SNR.

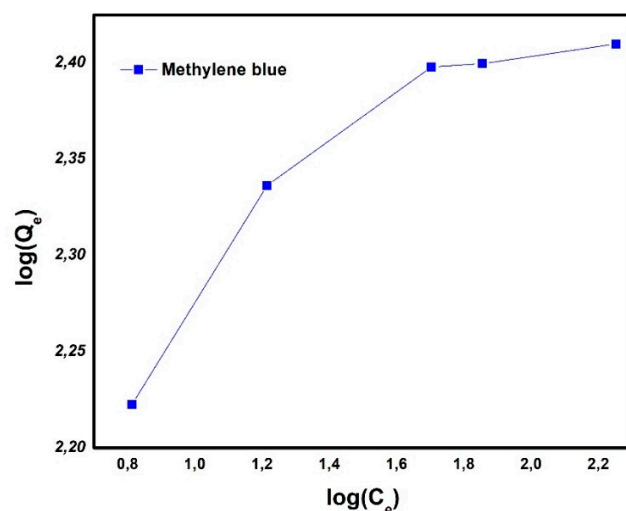

**Figure S7.** Freundlich Linear adsorption isotherm for the adsorption of methylene blue on Fe-C-SNR.

The linear Freundlich adsorption isotherm is given by  $\log(q_e) = \log K_F - \frac{1}{n} \log C_e$ . Subsequently, the correlation coefficient can be calculated and compared with the Langmuir model.

**Table S4.** Comparative table of the maximum adsorbed methylene blue from literature.

| Sample                                          | $Q_m$ (mg g <sup>-1</sup> ) | Ref       |
|-------------------------------------------------|-----------------------------|-----------|
| Fe-C-SNR                                        | 257                         | This work |
| Fe-C                                            | 125                         | This work |
| Fe-C-SB                                         | 139                         | This work |
| PF1-1-1-H                                       | 84                          | [1]       |
| Mg-Fe LDH                                       | 71.94                       | [2]       |
| ZVI-GAM                                         | 151.52                      | [3]       |
| nZVI                                            | 5.53                        | [4]       |
| BBCF of 1:2:3:                                  | 6.8                         | [5]       |
| NZVI                                            | 208.33                      | [6]       |
| Fe <sub>3</sub> O <sub>4</sub> @MIL-100(Fe)     | 221                         | [7]       |
| Fe <sub>3</sub> O <sub>4</sub> @C NPs           | 117                         | [8]       |
| Fe <sub>3</sub> O <sub>4</sub> carbon composite | 74                          | [9]       |

Figure S8 shows the strong peaks of Fe<sup>0</sup>, with the prominent diffraction peak at 44.6°. It is to note that a slight peak at 35°, matching Fe<sub>3</sub>O<sub>4</sub> is expectedly emerging due to the adsorption of water in the MIL-53-SNR before the pyrolysis procedure. Effectively, this does not influence the adsorption capabilities of Fe-C-SNR. Moreover, the XRD-spectra display that Fe-C-SNR does not present any noticeable change after the adsorption process.

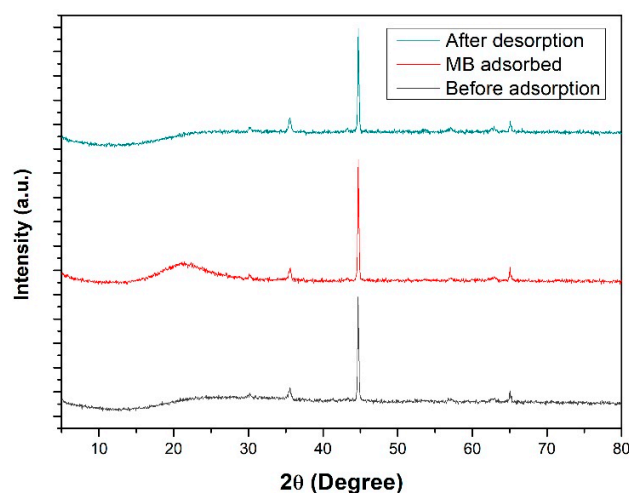

**Figure S8.** X-Ray diffraction spectra of Fe-C-SNR before adsorption, with MB adsorbed, and after desorption.

## References

1. Frost, R.L.; Xi, Y.; He, H. Synthesis, Characterization of Palygorskite Supported Zero-Valent Iron and Its Application for Methylene Blue Adsorption. *J. Colloid Interface Sci.* **2010**, *341*, 153–161, doi:10.1016/j.jcis.2009.09.027.
2. Shi, Z.; Wang, Y.; Sun, S.; Zhang, C.; Wang, H. Removal of Methylene Blue from Aqueous Solution Using Mg-Fe, Zn-Fe, Mn-Fe Layered Double Hydroxide. *Water Sci. Technol.* **2020**, *81*, 2522–2532, doi:10.2166/wst.2020.313.
3. Liu, J.; Wang, Y.; Fang, Y.; Mwamulima, T.; Song, S.; Peng, C. Accepted Manuscript Removal of Crystal Violet and Methylene Blue from Aqueous Solutions Using the Fly Ash-Based Adsorbent Material-Supported Zero-Valent Iron Removal of Crystal Violet and Methylene Blue from Aqueous Solutions Using the Fly Ash-Based Adsorbent Material-Supported Zero-Valent Iron. *J. Mol. Liq.* **2017**, doi:10.1016/j.molliq.2017.12.003.
4. Hamdy, A.; Hamdy, M.K.; Nasr, M. Zero-Valent Iron Nanoparticles for Methylene Blue Removal from Aqueous Solutions and Textile Wastewater Treatment, with Cost Estimation. *Water Sci. Technol.* **2018**, doi:10.2166/wst.2018.306.
5. Zhou, Y.; Gao, B.; Zimmerman, A.R.; Chen, H.; Zhang, M.; Cao, X. Biochar-Supported Zerovalent Iron for Removal of Various Contaminants from Aqueous Solutions. *Bioresour. Technol.* **2014**, *152*, 538–542, doi:10.1016/j.biortech.2013.11.021.
6. Arabi, S.; Sohrabi, M.R. Removal of Methylene Blue, a Basic Dye, from Aqueous Solutions Using Nano-Zerovalent Iron. *Water Sci. Technol.* **2014**, *70*, 24–31, doi:10.2166/wst.2014.189.
7. Aslam, S.; Zeng, J.; Subhan, F.; Li, M.; Lyu, F.; Li, Y.; Yan, Z.; Aslam, S.; Zeng, J.; Subhan, F.; et al. Accepted Manuscript In Situ One-Step Synthesis of Fe<sub>3</sub>O<sub>4</sub>@MIL-100(Fe) Core-Shells for Adsorption of Methylene Blue from Water In Situ One-Step Synthesis of Fe<sub>3</sub>O<sub>4</sub>@MIL-100(Fe) Core-Shells for Adsorption of Methylene Blue from Water. *J. Colloid Interface Sci.* **2017**, doi:10.1016/j.jcis.2017.05.090.
8. Wu, R.; Liu, J.-H.; Zhao, L.; Zhang, X.; Xie, J.; Yu, B.; Ma, X.; Yang, S.-T.; Wang, H.; Liu, Y. Hydrothermal Preparation of Magnetic Fe<sub>3</sub>O<sub>4</sub>@C Nanoparticles for Dye Adsorption. *Biochem. Pharmacol.* **2014**, *2*, 907–913, doi:10.1016/j.jece.2014.02.005.
9. Banerjee, A.; Gokhale, R.; Bhatnagar, S.; Jog, J.; Bhardwaj, M.; Lefez, B.; Hannoyer, B.; Ogale, S. MOF Derived Porous Carbon-Fe<sub>3</sub>O<sub>4</sub> Nanocomposite as a High Performance, Recyclable Environmental

Superadsorbent. *J. Mater. Chem.* **2012**, 22, 19694–19699, doi:10.1039/c2jm33798c.
